# Supplementary material for: Graphene Architecture-Supported Porous Cobalt–Iron Fluoride Nanosheets for Promoting the Oxygen Evolution Reaction
Source: MDPI journal article supplement (doi:10.3390/nano14010016), 2023-12-20
Supplement: s1 [file s1]

Supporting information

# **Graphene Architecture-Supported Porous Cobalt–Iron Fluoride Nanosheets for Promoting the Oxygen Evolution Reaction**

**Yanhui Lu, Xu Han, Yiting Zhang and Xu Yu \***

School of Chemistry and Chemical Engineering, Yangzhou University,  
Yangzhou 225000, China; 221004237@stu.yzu.edu.cn (Y.Z.)

\* Correspondence: xyypz15@yzu.edu.cn

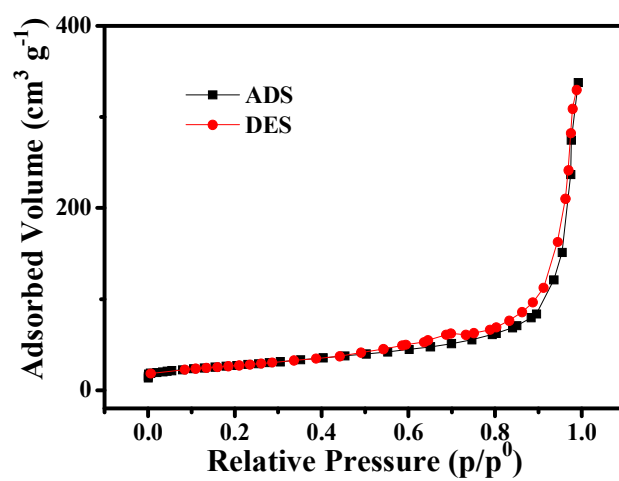

Figure S1 The nitrogen adsorption/desorption isotherms of CoFeF-GA.

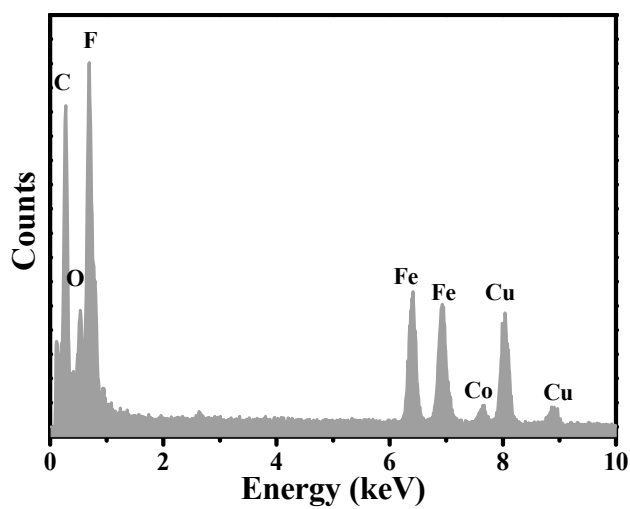

Figure S2 Energy dispersive X-ray spectroscopy of CoFeF-GA.

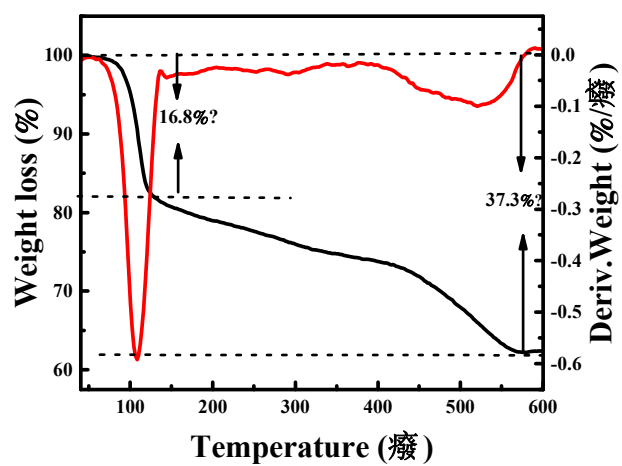

Figure S3 TGA full spectrum of the CoFeF-GA

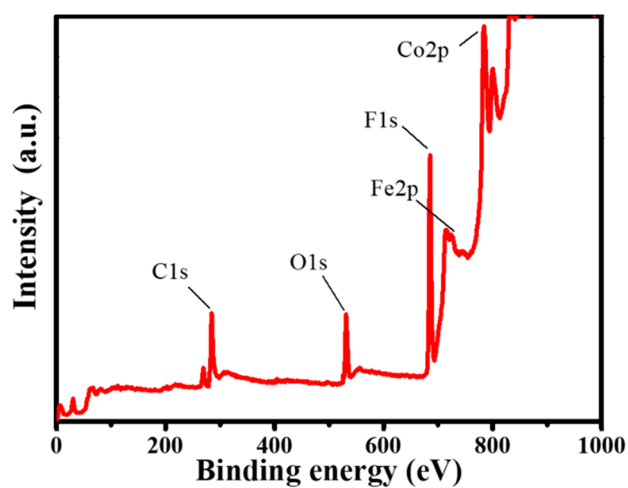

Figure S4 XPS full spectrum of the CoFeF-GA.

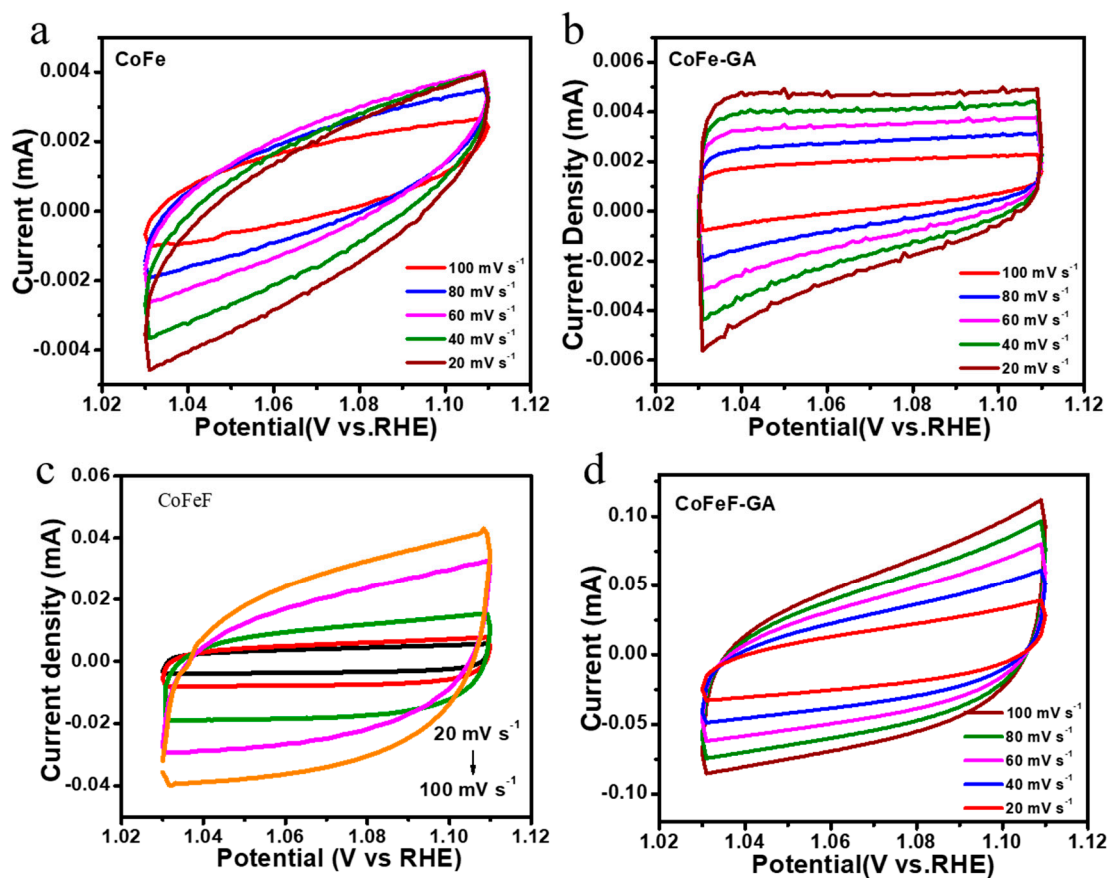

Figure S5 CV curves of (a) CoFe, (b) CoFe-GA, (c) CoFeF (d) CoFeF-GA in 1 M KOH at scan rates of 20, 40, 60, 80 and 100  $\text{mV s}^{-1}$ .

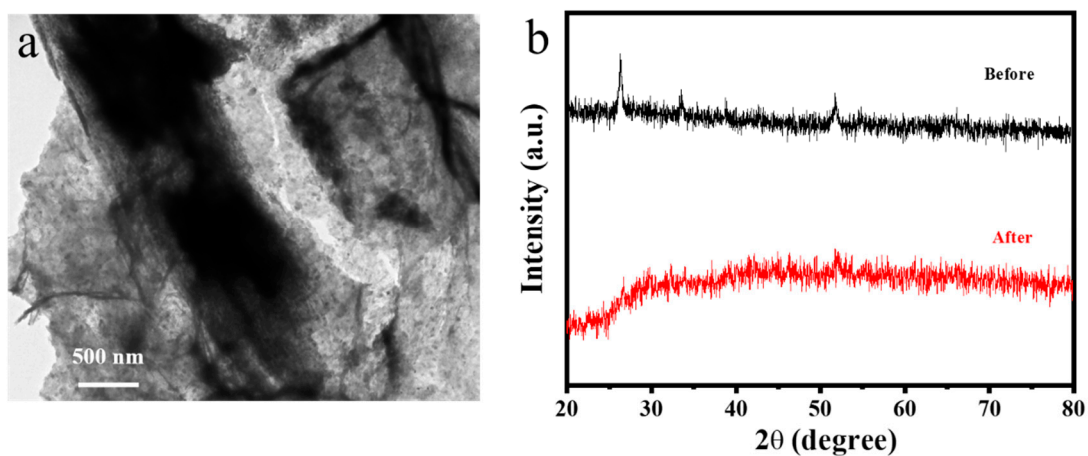

Figure S6 TEM image and XRD pattern of the CoFeF-GA catalyst after continuous CA test in 1.0 M KOH.

**Table S1** The comparison of other OER catalysts derived from transition metal-based materials in 1M KOH ( $\eta$ : overpotential at the current density of 10 mA cm<sup>-2</sup>)

| Materials                                                     | Morphology            | Overpotential (mV) | Ref       |
|---------------------------------------------------------------|-----------------------|--------------------|-----------|
| CoFeF-GA                                                      | Nanosheets            | 245                | This work |
| NiCoFe-LDH/CFC                                                | Nanosheets            | 280                | [1]       |
| KCo <sub>0.80</sub> Fe <sub>0.20</sub> F <sub>3</sub>         | Nanocubics            | 254                | [2]       |
| Co <sub>0.3</sub> Ni <sub>0.3</sub> Fe <sub>0.2</sub> S NPs/C | Nanoparticles         | 266                | [3]       |
| Meso-NPC/Co <sub>2</sub> NiO <sub>x</sub>                     | Hollow spheres        | 330                | [4]       |
| Fe <sub>2</sub> CoZn <sub>9+9</sub> -NO/WC                    | Wrinkled-nanocake     | 290                | [5]       |
| NiFeP-WO <sub>x</sub>                                         | Nanosheets- nanowires | 270                | [6]       |
| Fe-Co@NSDC                                                    | Nanocages             | 296                | [7]       |
| (Fe, Co, Ni) <sub>9</sub> S <sub>8</sub> /NSCFs               | Nanofibers            | 390                | [8]       |
| CNTAs-NG                                                      | Nanotubes             | 340                | [9]       |
| NiCoFe-LDH HP                                                 | Hollow polyhedron     | 276                | [10]      |
| Co(OH)F/Ni(OH) <sub>2</sub> @Fe(OH) <sub>3</sub> -D1          | Core-shell            | 270                | [11]      |

Table S2. The fitted  $R_s$ ,  $R_{ct}$  and  $R_1$  values of all catalysts.

| Catalysts | $R_s/\Omega$ | $R_{ct}/\Omega$ | $R_1/\Omega$ |
|-----------|--------------|-----------------|--------------|
| CoFeF     | 8.01         | 44.9            | 4.07         |
| CoFe      | 11.84        | 160.7           | 3.51         |
| CoFe-GA   | 10.52        | 144.9           | 18.62        |
| CoFeF-GA  | 9.53         | 17.74           | 1.74         |

Table S3. Detailed values of Cdl, ECSA and Rf of all catalysts.

| Samples  | $C_{dl}(\text{mF cm}^{-1})$ | $ECSA(\text{cm}^2)$ | $R_f$ |
|----------|-----------------------------|---------------------|-------|
| CoFe     | 0.01                        | 0.0175              | 0.25  |
| CoFeF    | 0.32                        | 0.56                | 8     |
| CoFe-GA  | 0.03                        | 0.0525              | 0.75  |
| CoFeF-GA | 0.50                        | 0.875               | 12.5  |

## References

1. Wang T.;Xu W. and Wang H. Ternary NiCoFe Layered Double Hydroxide Nanosheets Synthesized by Cation Exchange Reaction for Oxygen Evolution Reaction. *Electrochim. Acta.* **2017**, 257, 118-127
2. Li W.;Murisana A.;Zhang Q.;Wang S. and De G. Controlled synthesis and M-position regulation of perovskite fluoride  $\text{KMf}_3$  (M=Co/Fe) with high-efficiency OER performance. *Electrochem. Commun.* **2022**, 141, 107363
3. Wang G.;Cao W.;Zhang Z.;Liu L.;Wang C.;Yin J. and Zhou H. Ternary sulfide nanoparticles anchored in carbon bubble structure for oxygen evolution reaction. *J. Alloys Compd.* **2023**, 968, 172314
4. Wang J. and Zeng H. C. Hybrid OER Electrocatalyst Combining Mesoporous Hollow Spheres of N, P-Doped Carbon with Ultrafine  $\text{Co}_2\text{NiO}_x$ . *ACS Appl. Mater. Interfaces.* **2020**, 12, 50324-50332
5. Xue J.;Liu Z.;Fan Y.;Wang R. and Li Y. ZIF-derived Fe,Co coordinated N/O-codoped three-dimensional tungsten-carbon matrix for the performance-enhanced zinc-air flow battery and water splitting. *Chem. Eng. J.* **2023**, 476, 146502
6. Kim D.;Jeong Y.;Roh H.;Lim C. and Yong K. Biomimetic 2D-Ni(Co,Fe)P/1D-WO<sub>x</sub> nanocoral reef electrocatalysts for efficient water splitting. *J. Mater. Chem. A.* **2021**, 9, 10909-10920
7. Li Z.;Zhang L.;Zhu Q.;Ke Z. and Hu G. Spatial separation strategy to construct N/S co-doped carbon nanobox embedded with asymmetrically coupled Fe-Co pair-site for boosted reversible oxygen electrocatalysis. *J. Colloid Interface Sci.* **2024**, 653, 1577-1587
8. Jiang T.;Dai P.;Zhang W. and Wu M. Fish bone-derived N, S co-doped interconnected carbon nanofibers network coupled with (Fe, Co, Ni)<sub>9</sub>S<sub>8</sub> nanoparticles as efficient bifunctional electrocatalysts for rechargeable and flexible all-solid-state Zn-air battery. *Electrochim. Acta.* **2021**, 373, 137903
9. Zhang Y.;Wang P.;Yang J.;Li K.;Zhang N.;Liu G.;Duan Y. and Qiu J. Mechanochemical coordination self-assembly for Cobalt-based metal-organic framework-derived bifunctional oxygen electrocatalysts. *J. Colloid Interface Sci.* **2022**, 613, 733-746
10. Qin Y.;Wang F.;Shang J.;Iqbal M.;Han A.;Sun X.;Xu H. and Liu J. Ternary NiCoFe-layered double hydroxide hollow polyhedrons as highly efficient electrocatalysts for oxygen evolution reaction. *J. Energy Chem.* **2020**, 43, 104-107
11. Jiu H.;Wei H.;Wang C.;Che S.;Guo Z.;Han Y.;Xu Q.;Yu X. and Zhang L. Construction of  $\text{Co}(\text{OH})\text{F}/\text{Ni}(\text{OH})_2@\text{Fe}(\text{OH})_3$  core-shell heterojunction on nickel foam for efficient oxygen evolution. *Int. J. Hydrogen Energy.* **2022**, 47, 33719-33727
